In-hospital outcomes in nonagenarian patients undergoing primary percutaneous coronary intervention

F. Angelini<sup>1</sup>, L. Franchin<sup>1</sup>, P.P. Bocchino<sup>1</sup>, O. De Filippo<sup>1</sup>, N. Morici<sup>2</sup>, W. Wanh<sup>3</sup>, S. Savonitto<sup>4</sup>, D. Trabattoni<sup>5</sup>, E. Cerrato<sup>6</sup>, L. Barbieri<sup>7</sup>, L. De Luca<sup>8</sup>, F. Fortuni<sup>9</sup>, D. Capodanno<sup>10</sup>, F. D'Ascenzo<sup>1</sup>, G.M. De Ferrari<sup>1</sup>

<sup>1</sup>A.O.U. Citta della Salute e della Scienza di Torino, Division of Cardiology, Turin, Italy; <sup>2</sup>Niguarda hospital, Cardiology, Milan, Italy; <sup>3</sup>University of Silesia, Cardiology, Katowice, Poland; <sup>4</sup>Alessandro Manzoni Hospital, Cardiology, Lecco, Italy; <sup>5</sup>Monzino Cardiology Center, IRCCS, Cardiology, Milan, Italy; <sup>6</sup>Degli Infermi Hospital, Cardiology, Rivoli, Italy; <sup>7</sup>ASST Santi Paolo e Carlo, Milan, Italy; <sup>8</sup>S. Camillo-Forlanini Hospital, Cardiology, Rome, Italy; <sup>9</sup>Policlinic Foundation San Matteo IRCCS, Division of Cardiology, Pavia, Italy; <sup>10</sup>University of Catania, Catania, Italy  
On behalf of SENEX group

Funding Acknowledgement: Type of funding sources: None.

**Objective:** The aim of the present analysis was to evaluate the incidence and predictors of in-hospital adverse outcomes in nonagenarian patients undergoing primary percutaneous coronary intervention (pPCI) for ST-segment elevation myocardial infarction (STEMI).  
**Methods:** Consecutive nonagenarian patients undergoing pPCI for STEMI from 2009 to 2019 were retrospectively included in an international multi-center registry. In-hospital all-cause death was the primary outcome.  
**Results:** A total of 308 patients were included (mean age 92.5±2.5 years, 65.6% female). Mean systolic blood pressure (SBP) at hospital admission was 130.7±33.5 mmHg, 46 (17%) patients presented with a Killip class III-IV, mean left ventricle ejection fraction (LVEF) was 40.0±11.5% and 147 (58%) patients were independent in everyday activities. In-hospital

death occurred in 99 patients (32%). [Figure 1] After multivariate adjustment, lower LVEF (OR per unit reduction 1.08, 95% CI 1.03–1.11, p-value <0.001), lower SBP (OR 0.98 per mmHg reduction, 95% CI 1.01–1.03, p-value 0.001) and being not independent at home (OR 2.56, 95% CI 1.25–5.26, p-value 0.01) resulted independent predictors of in-hospital mortality. [Figure 2] A sensitivity analysis performed in final TIMI 3 flow population confirmed the prognostic role of LVEF and independency on in-hospital mortality.  
**Conclusion:** Nonagenarian patients presenting with STEMI and undergoing pPCI have high in-hospital mortality. Independency in everyday life is a strong independent predictor of survival to hospital discharge.

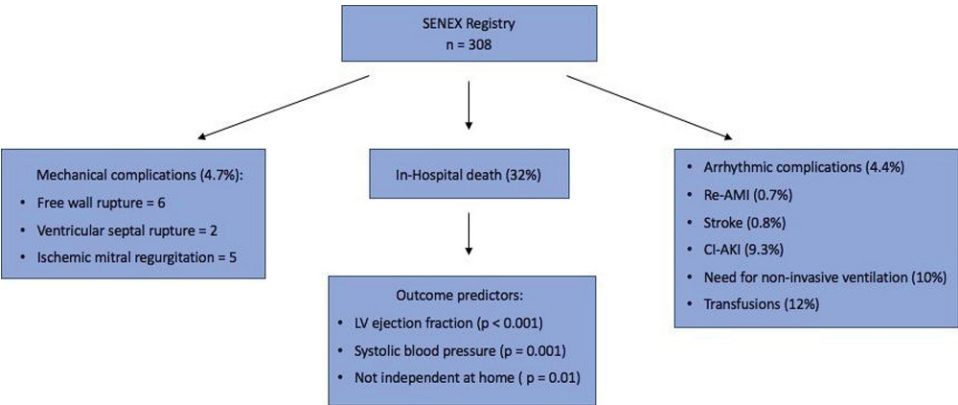

Figure 1

|                                        | Wald  | OR   | 95% CI    | p-value |
|----------------------------------------|-------|------|-----------|---------|
| LVEF (per unit reduction)              | 16.22 | 1.08 | 1.03-1.11 | < 0.001 |
| SBP (per unit reduction)               | 10.65 | 1.02 | 1.01-1.03 | 0.001   |
| Not independent                        | 6.64  | 2.56 | 1.25-5.26 | 0.010   |
| History of hypertension                | 1.10  | 0.62 | 0.26-1.52 | 0.295   |
| eGFR at admission (per unit reduction) | 0.19  | 1.01 | 0.98-1.02 | 0.667   |

Figure 2
